# Supplementary material for: Magnetically Assisted Control of Stem Cells Applied in 2D, 3D and In Situ Models of Cell Migration
Source: MDPI journal article supplement (doi:10.3390/molecules24081563), 2019-04-19
Supplement: s1 [file s1]

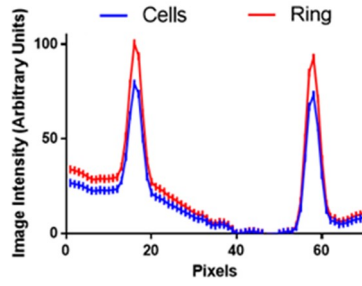

**Figure S1.** Image analysis for Figure 1e showing toluidine blue signal intensity across the well midline and the geometry of the ring structure used (red). (n = 3 measurements).

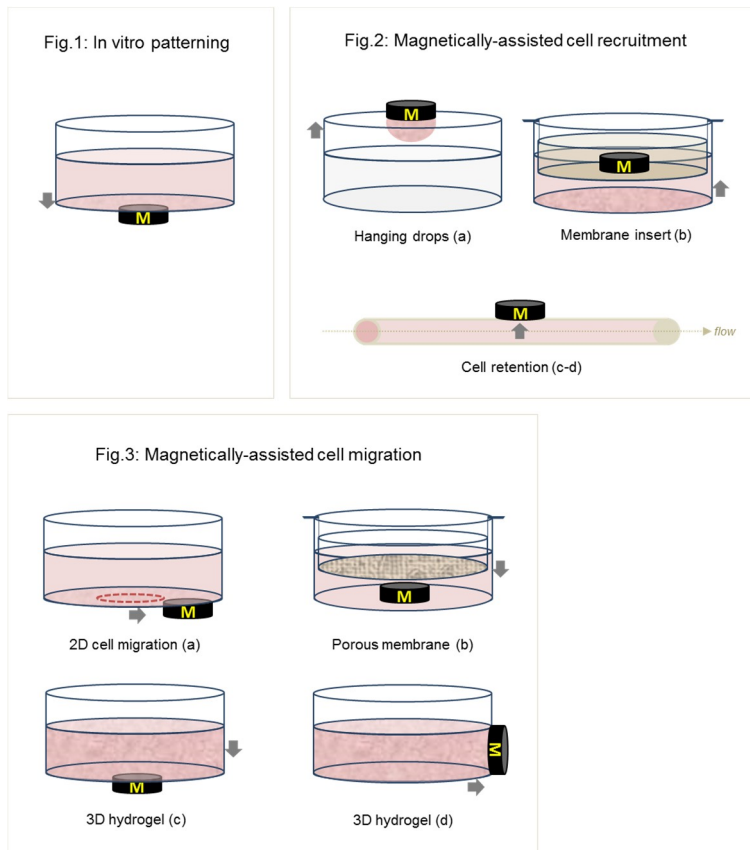

**Figure S2.** Graphical representation of the in vitro layouts used, showing the magnet (M) position and direction of movement (grey arrow).
